# Supplementary material
Source: publisher figshare collection journal article supplement (https://acs.figshare.com/ndownloader/files/18609098)
Supplement: Supplementary file 1 [file 18609098]

**The effect of a shading mesh on the metabolic, nutritional and defense profiles of greenhouse harvested organic tomato fruits and leaves revealed by NMR metabolomics**

**Ana Cristina Abreu,<sup>a</sup> Patricia Marín,<sup>b</sup> Luis Manuel Aguilera-Sáez,<sup>a</sup> Ana Isabel Tristán,<sup>a</sup> Araceli Peña,<sup>b</sup> Isabel Oliveira,<sup>c</sup> Manuel Simões,<sup>c</sup> Diego Valera<sup>b</sup> and Ignacio Fernández<sup>a,\*</sup>**

<sup>a</sup> Department of Chemistry and Physics, Research Centre CIAIMBITAL, University of Almería, Ctra. Sacramento, s/n, 04120, Almería (Spain)

<sup>b</sup> Department of Engineering, Research Centre CIAIMBITAL, University of Almería, Ctra. Sacramento, s/n, 04120, Almería (Spain)

<sup>c</sup> Laboratory for Process Engineering, Environment, Biotechnology and Energy (LEPABE), Department of Chemical Engineering, Faculty of Engineering, University of Porto, Porto (Portugal)

\*Corresponding author: ifernan@ual.es

Telephone number: +34 950214465; E-mail address: ifernan@ual.es

## **Table of Contents**

Analysis of fatty acids content

Analysis of carotenoids content

**Figure S1.** (a) Organic tomato variety DELYCA; (b) image of the shading mesh.

**Figure S2.** Scheme of the greenhouse.

**Figure S3.** (a) OPLS and (b) OPLS-DA scores plots applied.

Figure S4. HPLC-DAD quantification of lycopene and  $\beta$ -carotene.

**Table S1.** Chemical shifts (ppm), multiplicity and coupling constants (Hz) for the metabolites identified.

**Table S2.** GC-FID fatty acid profile.

**Table S3.** Chemical shifts (ppm), multiplicity and coupling constants (Hz) for the metabolites identified on methanolic extracts of tomato leaves (EtOAc fractions).

**Analysis of fatty acids content.** The fatty acid content and profile in tomato samples were determined by gas chromatography (Agilent Technologies 6890 N Series Gas Chromatograph, Santa Clara, CA, USA) after direct transesterification as described by Rodríguez-Ruiz et al.<sup>1</sup>

**Analysis of carotenoids content.** The analysis of carotenoids was performed as described by Cerón-García et al.<sup>2</sup> Briefly, 20 mg of dry tomato was placed in glass Pyrex tubes and 1 ml of monophasic tricomponent solution was added. The tricomponent solution was composed of ethanol:hexane:water in a proportion of 77:17:6 v/v/v and contained 0–60% d.w. potassiumhydroxide (KOH) ( $((\text{g KOH/g dry biomass}) \times 100)$ ). The tube was submerged in a water bath with a preset temperature of 45 °C, where it was left for 5 min. After this, the tube was taken out and vortexed for 30 s and left to cool for 1 h at room temperature. Subsequently, it was centrifuged at 12000 rpm for 2 min (Mini Spin Plus, Eppendorf) and the supernatant transferred into a vial. The carotenoid content and profile were determined using a photodiode-array HPLC (HPLC-DAD) apparatus (Shimadzu SPDM10AV). All the measurements were carried out by duplicate.

a)

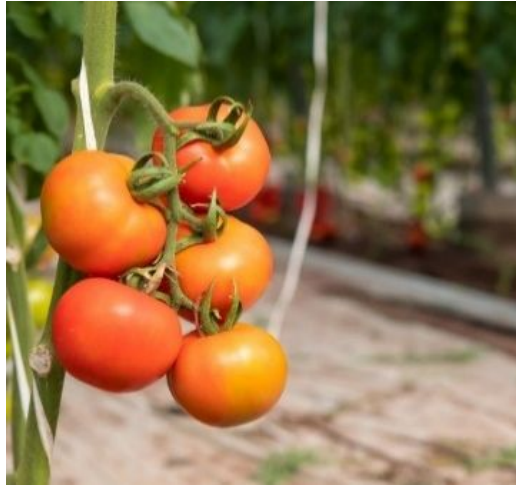

b)

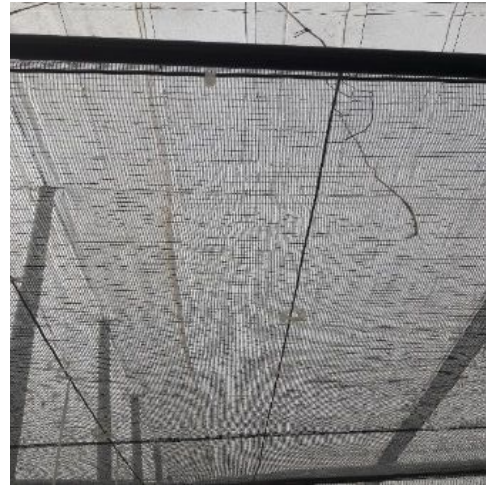

**Figure S1.** (a) Organic tomato variety DELYCA; (b) image of the shading mesh (polypropylene, gray, 50% reduction in light intensity) applied in an area of the plantation.

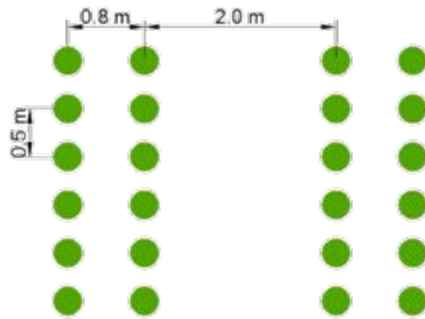

**Figure S2.** Scheme of the greenhouse: the crop was planted in paired lines, spaced 0.8 m part, the separation between lines was 2 m and the separation between plants was 0.5 m. Each line contained 16 plants. The planting framework used is 1.43 plants m<sup>-2</sup>.

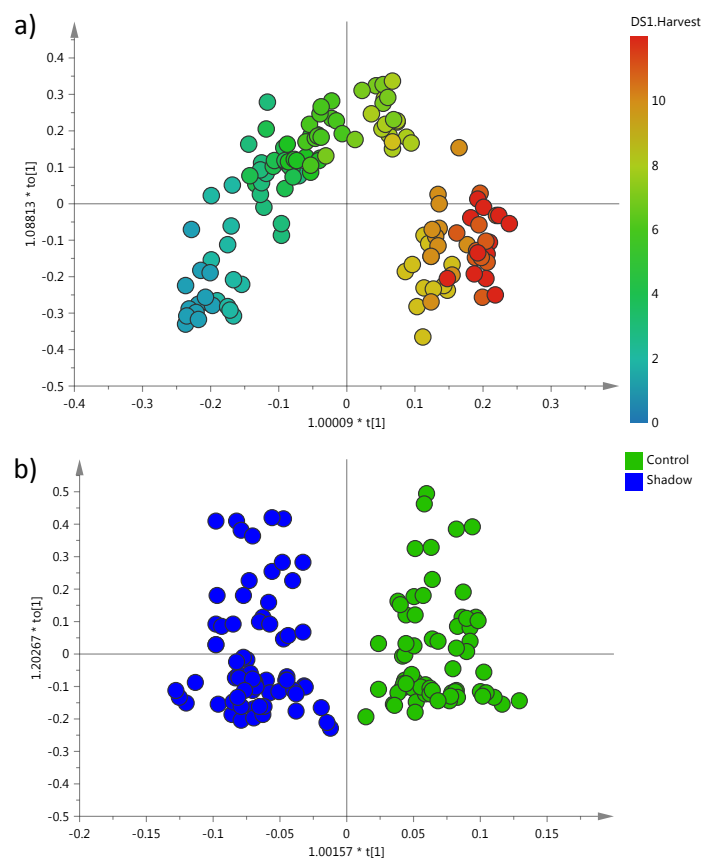

**Figure S3.** (a) OPLS and (b) OPLS-DA scores plots applied to  $^1\text{H}$  NMR data of a total of 144  $\text{CD}_3\text{OD}$ :  $\text{D}_2\text{O}$   $\text{KH}_2\text{PO}_4$  buffer (80:20, v/v) extracts of tomatoes to discriminate tomatoes according to harvest date and shading regime, respectively. Both models were used to build the SUS-plot presented in Figure 5. Scaling was done to pareto. (a):  $R^2\text{X} = 0.862$ ,  $R^2\text{Y} = 0.974$ ,  $Q^2 = 0.961$ ,  $p$  (CV-ANOVA) = 0 ( $< 0.00001$ ); (b):  $R^2\text{X} = 0.897$ ,  $R^2\text{Y} = 0.880$ ,  $Q^2 = 0.768$ ,  $p$  (CV-ANOVA) =  $2.66 \times 10^{-30}$ .

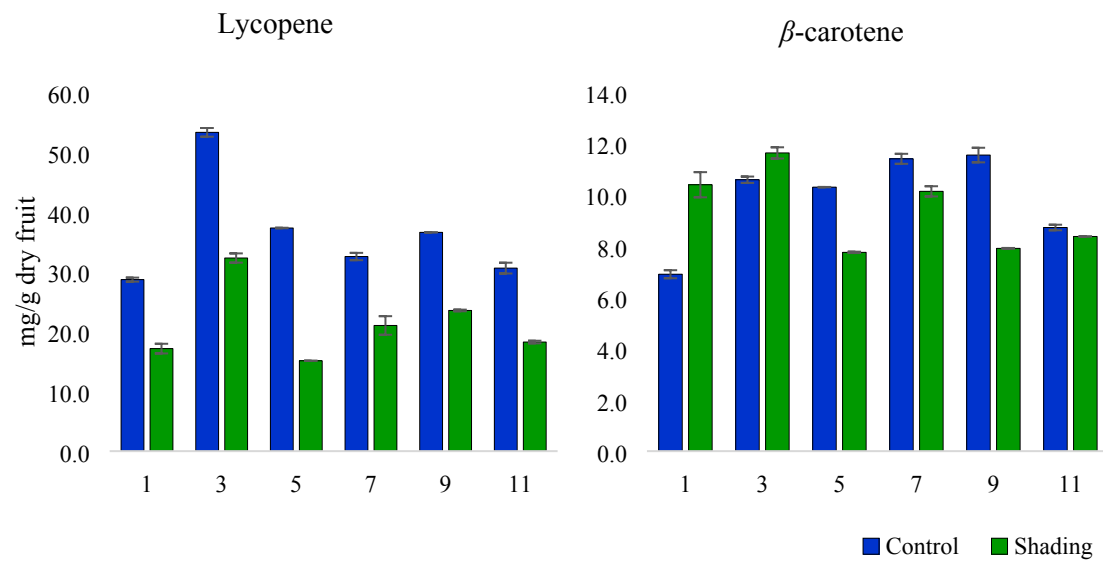

**Figure S4.** HPLC-DAD quantification of lycopene and  $\beta$ -carotene for shaded and non-shaded (control) tomatoes collected every two weeks.

**Table S1.** Chemical shifts (ppm), multiplicity and coupling constants (Hz) for the metabolites identified on methanol and phosphate buffer (80:20, v/v) extracts of tomato fruits

| Metabolite           |               | Peak assignments                                                                           |
|----------------------|---------------|--------------------------------------------------------------------------------------------|
| <i>Amino acids</i>   |               |                                                                                            |
| 1                    | Valine        | 1.01 (d, $J = 7.2$ Hz), 1.06 (d, $J = 7.1$ Hz)                                             |
| 2                    | Isoleucine    | 0.95 (t, $J = 7.4$ Hz), 1.02 (d, $J = 7.2$ Hz)                                             |
| 3                    | Leucine       | 0.97 (d, $J = 6.3$ Hz), 0.98 (d, $J = 6.3$ Hz)                                             |
| 4                    | Threonine     | 1.33 (d, $J = 6.7$ Hz)                                                                     |
| 5                    | Alanine       | 1.47 (d, $J = 7.2$ Hz)                                                                     |
| 6                    | GABA          | 1.91 (quint, $J = 7.3$ Hz), 2.39 (t, $J = 7.3$ Hz), 2.99 (t, $J = 7.3$ Hz)                 |
| 7                    | Lysine        | 1.51 (m), 1.72 (m), 1.92 (m)                                                               |
| 8                    | Arginine      | 1.69 (m), 1.88 (m)                                                                         |
| 9                    | Glutamate     | 2.07 (m), 2.09 (m), 2.50 (m)                                                               |
| 10                   | Glutamine     | 2.15 (m), 2.48 (m)                                                                         |
| 11                   | Aspartate     | 2.69 (dd, $J = 17.5, 9.0$ Hz), 2.87 (dd, $J = 17.5, 3.8$ Hz)                               |
| 12                   | Asparagine    | 2.80 (dd, $J = 17.0, 8.7$ Hz), 2.94 (dd, $J = 17.0, 3.9$ Hz)                               |
| 13                   | Tyrosine      | 6.80 (d, $J = 8.5$ Hz), 7.15 (d, $J = 8.5$ Hz)                                             |
| 14                   | Phenylalanine | 7.29 (m), 7.32 (m), 7.36 (m)                                                               |
| 15                   | Tryptophan    | 7.06 (m), 7.14 (m), 7.23 (s), 7.40 (d, $J = 8.0$ Hz), 7.70 (d, $J = 8.0$ Hz)               |
| 16                   | Histidine     | 7.27 (d, $J = 1.2$ Hz), 8.28 (d, $J = 1.2$ Hz)                                             |
| <i>Organic acids</i> |               |                                                                                            |
| 17                   | Acetate       | 1.98 (s)                                                                                   |
| 18                   | Malate        | 2.57 (dd, $J = 16.0, 7.6$ Hz), 2.79 (dd, $J = 16.0, 5.0$ Hz), 4.32 (dd, $J = 7.6, 5.0$ Hz) |
| 19                   | Citrate       | 2.70 (d, $J = 15.7$ Hz), 2.80 (d, $J = 15.7$ Hz)                                           |
| 20                   | Fumarate      | 6.66 (s)                                                                                   |
| 21                   | Formate       | 8.41 (s)                                                                                   |
| <i>Sugars</i>        |               |                                                                                            |
| 22                   | Fructose      | 4.05 (m)                                                                                   |
| 23                   | Glucose       | 4.52 (d, $J = 8.3$ Hz), 5.14 d, $J = 3.7$ Hz)                                              |



|    |           |                                                |
|----|-----------|------------------------------------------------|
| 24 | Galactose | 4.52 (d, $J = 7.8$ Hz), 5.28 (d, $J = 3.7$ Hz) |
| 25 | Sucrose   | 5.41 (d, $J = 3.7$ Hz)                         |

#### *Nucleosides/tides*

|    |                |                                                                        |
|----|----------------|------------------------------------------------------------------------|
| 26 | Adenosine      | 5.99 (d, $J = 6.4$ Hz), 8.20 (s), 8.33 (s)                             |
| 27 | Uridine        | 5.79 (d, $J = 8.1$ Hz), 5.89 (d, $J = 4.7$ Hz), 7.97 (d, $J = 8.1$ Hz) |
| 28 | Adenosine-like | 6.10 (d, $J = 5.9$ Hz), 8.22 (s), 8.55 (s)                             |
| 29 | Uridine-like   | 5.87 (d, $J = 7.6$ Hz), 8.04 (d, $J = 8.2$ Hz)                         |

#### *Phenylpropanoids and phenolic compounds*

|    |                            |                                                                                                                                 |
|----|----------------------------|---------------------------------------------------------------------------------------------------------------------------------|
| 30 | Cinnamic acid derivative 1 | 6.31 (d, $J = 15.8$ Hz), 7.58 (d, $J = 15.8$ Hz)                                                                                |
| 31 | Cinnamic acid derivative 2 | 6.33 (d, $J = 15.7$ Hz), 7.53 (d, $J = 15.7$ Hz)                                                                                |
| 32 | Cinnamic acid derivative 3 | 6.38 (d, $J = 15.6$ Hz), 7.61 (d, $J = 15.6$ Hz)                                                                                |
| 33 | Cinnamic acid derivative 4 | 6.40 (d, $J = 15.8$ Hz), 7.64 (d, $J = 15.8$ Hz)                                                                                |
| 34 | Rutin                      | 6.27 (d, $J = 1.8$ Hz), 6.48 (d, $J = 1.8$ Hz), 6.90 (d, $J = 8.7$ Hz),<br>7.63 (dd, $J = 8.7, 2.0$ Hz), 7.66 (d, $J = 2.0$ Hz) |
| 35 | Quercetin-like             | 6.25 (d, $J = 2.0$ Hz), 6.46 (d, $J = 2.0$ Hz), 6.87 (d, $J = 8.4$ Hz),<br>7.54 (dd, $J = 8.4, 2.1$ Hz), 7.67 (d, $J = 2.1$ Hz) |

#### *Others*

|    |                      |                                                                                                                                                                                                                                                                                                                                                                                  |
|----|----------------------|----------------------------------------------------------------------------------------------------------------------------------------------------------------------------------------------------------------------------------------------------------------------------------------------------------------------------------------------------------------------------------|
| 36 | Ascorbate            | 4.68 (d, $J = 2.2$ Hz)                                                                                                                                                                                                                                                                                                                                                           |
| 37 | Choline              | 3.21 (s)                                                                                                                                                                                                                                                                                                                                                                         |
| 38 | Trigonelline         | 8.08 (dd, $J = 8.0; 6.1$ Hz), 8.86 (d, $J = 6.1$ Hz), 8.89 (d, $J = 8.0$ Hz), 9.17 (s)                                                                                                                                                                                                                                                                                           |
| 39 | Nicotinurate         | 8.31 (m), 9.03 (m), 9.38 (s)                                                                                                                                                                                                                                                                                                                                                     |
| 40 | 1-Methylnicotinamide | 9.59 (s), 9.33 (m), 9.04 (m)                                                                                                                                                                                                                                                                                                                                                     |
| 41 | Sterols              | 0.65-0.75 (s)                                                                                                                                                                                                                                                                                                                                                                    |
| 42 | Fatty acids*         | 0.87 ( $-\text{CH}_3$ , for all FA except n-3), 0.96 ( $-\text{CH}_3$ , for n-3),<br>1.24-1.36 ( $-(\text{CH}_2)_n-$ ), 1.60 ( $-\text{CH}_2-\text{CH}_2-\text{COOR}$ ), 2.04 ( $-\text{CH}_2-\text{CH}=\text{CH}-$ , for UFA), 2.34 ( $-\text{CH}_2-\text{COOR}$ ), 2.78 ( $=\text{CH}-\text{CH}_2-\text{CH}=\text{CH}-$ , for PUFA), 5.34 ( $-\text{CH}=\text{CH}-$ , for UFA) |

---

\* characterization of fatty acids by GC-FID is presented in Table S2. Acronyms: FA: fatty acids, UFA, unsaturated fatty acids, PUFA, polyunsaturated fatty acids, n-3: omega-3.

**Table S2.** GC-FID fatty acid profile and concentration regarding dried tomato

| Fatty acid |                     | Conc. (mg/ g dried tomato) | %    |
|------------|---------------------|----------------------------|------|
| C8:0       | Caprylic acid       | $7.9 \pm 3.3$              | 5.2  |
| C10:0      | Capric acid         | $9.7 \pm 3.4$              | 6.5  |
| C12:0      | Lauric acid         | $4.8 \pm 2.4$              | 3.2  |
| C16:0      | Palmitic acid       | $25.8 \pm 5.2$             | 17.1 |
| C18:0      | Stearic acid        | $8.9 \pm 2.1$              | 5.9  |
| C16:1n7    | Palmitoleic acid    | $2.0 \pm 1.0$              | 1.3  |
| C18:1n9    | Oleic               | $19.3 \pm 7.4$             | 12.8 |
| C18:2n6    | Linoleic            | $63.0 \pm 9.9$             | 41.8 |
| C18:3n3    | $\alpha$ -Linolenic | $9.3 \pm 3.8$              | 6.2  |

**Table S3.** Chemical shifts (ppm), multiplicity and coupling constants (Hz) for the metabolites identified on methanolic extracts of tomato leaves (EtOAc fractions)

| Assigned<br>metabolites |                | Peak assignments                                                                                                   |
|-------------------------|----------------|--------------------------------------------------------------------------------------------------------------------|
| 1                       | Quercetin-like | 6.19 (d, $J=2.1$ Hz), 6.38 (d, $J=2.1$ Hz), 6.85 (d, $J=8.3$ Hz), 7.61 (dd, $J=8.3, 2.2$ Hz), 7.64 (d, $J=2.2$ Hz) |
| 2                       | Cinnamic acid  | 6.27 ppm (d, $J=15.8$ Hz), 7.54 ppm (d, $J=15.8$ Hz)                                                               |
| 3                       | Trigonelline   | 8.01 (dd, $J=7.3.0; 5.9$ Hz), 8.82 (d, $J=5.9$ Hz), 8.87 (d, $J=7.3$ Hz), 9.17 (s)                                 |
| 4                       | Formate        | 8.70 (s)                                                                                                           |
| 5                       | Phenylalanine  | 7.27 (m), 7.30 (m)                                                                                                 |
| 6                       | Tyrosine       | 6.71 (d, $J=8.5$ Hz), 7.03 (d, $J=8.5$ Hz)                                                                         |
| 7                       | Tryptophan     | 7.05 (m), 7.21 (m), 7.22 (s), 7.37 (d, $J=8.0$ Hz), 7.63 (d, $J=8.0$ Hz)                                           |

## REFERENCES

---

<sup>1</sup> Rodríguez-Ruiz, J.; Belarbi, E.-H.; Sánchez, J. L. G.; Alonso, D. L. Rapid simultaneous lipid extraction and transesterification for fatty acid analyses. *Biotechnol. Tech.* **1998**, *12* (9), 689-691.

<sup>2</sup> Cerón-García, M. C.; González-López, C. V.; Camacho-Rodríguez, J.; López-Rosales, L.; García-Camacho, F.; Molina-Grima, E. Maximizing carotenoid extraction from microalgae used as food additives and determined by liquid chromatography (HPLC). *Food Chem.* **2018**, *257*, 316-324.
